# Supplementary material
Source: PubMed Central journal article supplement (PMC7533658)
Supplement: pnas.2007224117.sapp.pdf [file pnas.2007224117.sapp.pdf]

## SUPPLEMENTARY MATERIAL

Fig. S1. NR4A3 restrains MPEC generation across several models.

Fig. S2. Normal differentiation of OT-I T cells in absence of NR4A3.

Fig. S3. NR4A3 decreases cytokine production by CD8<sup>+</sup> effector cells.

Fig. S4. NR4A3 deficiency favors polyfunctional central memory formation and restrains terminal differentiation of secondary effectors.

Fig. S5. *In vivo* transcription kinetics of *Nr4a3*, characterization of early response of NR4A3-deficient OT-I T cells and validation of RNA-seq results.

Fig. S6. Characterization of *in vitro* generated NR4A3-deficient OT-I effector cells and overlap between ATAC-seq and RNA-seq datasets.

Dataset S1. RNA-seq dataset.

Dataset S2. ATAC-seq dataset.

Dataset S3. ATAC-seq dataset with NBRE motifs annotation.

Table S1. Antibodies and reagents.

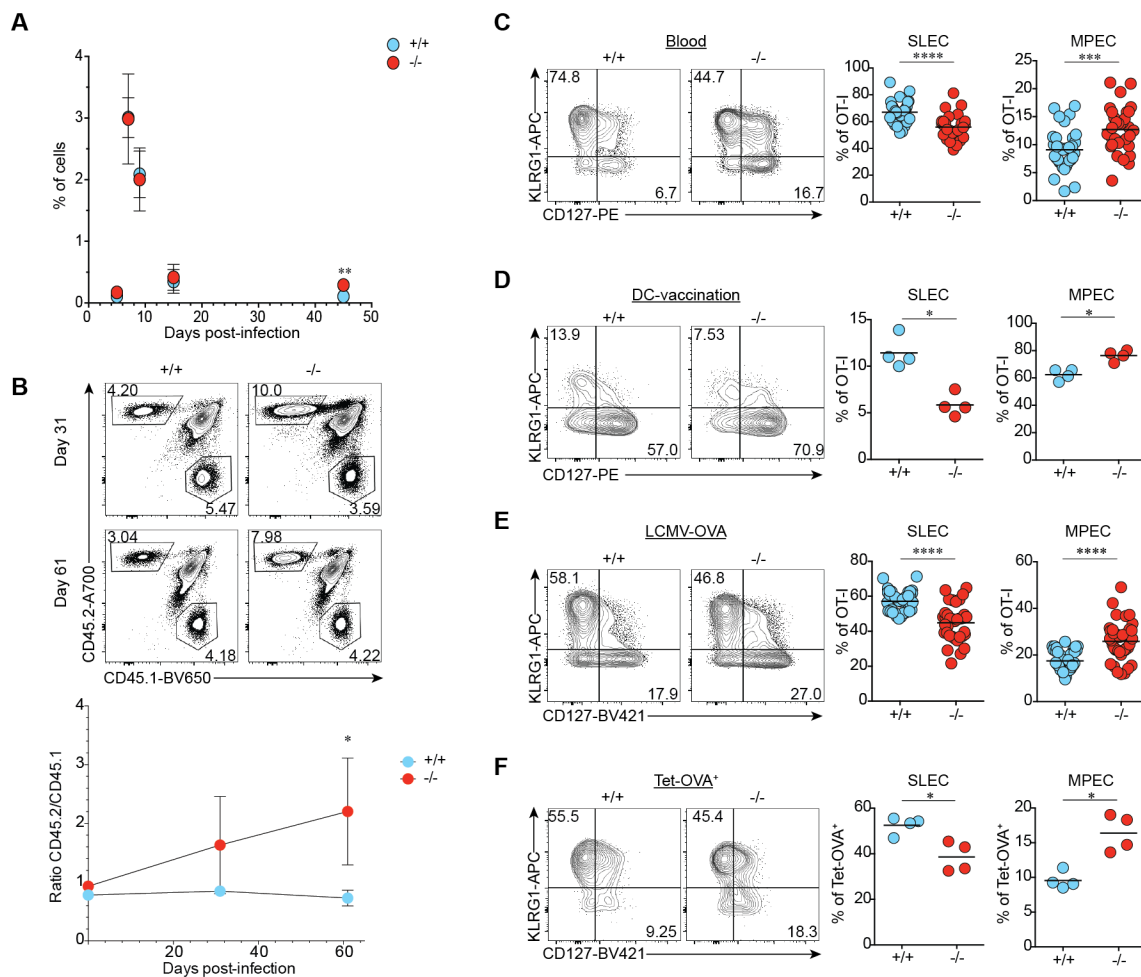

**Figure S1. NR4A3 restrains MPEC generation across several models. A.** Kinetic response in the spleen of *Nr4a3*<sup>+/+</sup> and *Nr4a3*<sup>-/-</sup> OT-I T cells after adoptive transfer and Lm-OVA infection. **B.** Generation of *Nr4a3*<sup>+/+</sup> and *Nr4a3*<sup>-/-</sup> OT-I memory T cells (CD45.2<sup>+</sup>) when in competition with WT B6.SJL OT-I T cells (CD45.1<sup>+</sup>) following LCMV-OVA infection. Representative CD45.1 vs CD45.2 dot plots gated on CD8<sup>+</sup> T cells and ratios of CD45.2<sup>+</sup> OT-I T cells on CD45.1<sup>+</sup> OT-I T cells are shown over time. **C.** Proportion of SLECs and MPECs within OT-I T cells in the blood at day 7 post Lm-OVA infection. **D-E.** SLEC and MPEC differentiation of *Nr4a3*<sup>+/+</sup> and *Nr4a3*<sup>-/-</sup> OT-I cells following DC-OVA vaccination (**D** – day 6 of the response in the spleen) or LCMV-OVA infection (**E** – day 8 of the response in the blood in the OT-I competitive model; as in **B**). **F.** Polyclonal CD8<sup>+</sup> T cell responses of *Nr4a3*<sup>+/+</sup> and *Nr4a3*<sup>-/-</sup> mice were measured at day 7 post-infection with Lm-OVA. MPEC/SLEC differentiation was evaluated *ex vivo* on K<sup>b</sup>-OVA tetramer<sup>+</sup> cells. Data are from 1 (**A, B, D, F**) or at

least 3 independent experiments (**C, E**). A Mann-Whitney unpaired t-test (**A, B, D, F**) was used with a low number of samples and the unpaired Student's t-test (**C, E**), with a Welch's correction when applied, was used for the other comparisons: \* $P < 0.05$ , \*\* $P < 0.01$ , \*\*\* $P < 0.001$ , \*\*\*\* $P < 0.0001$ .

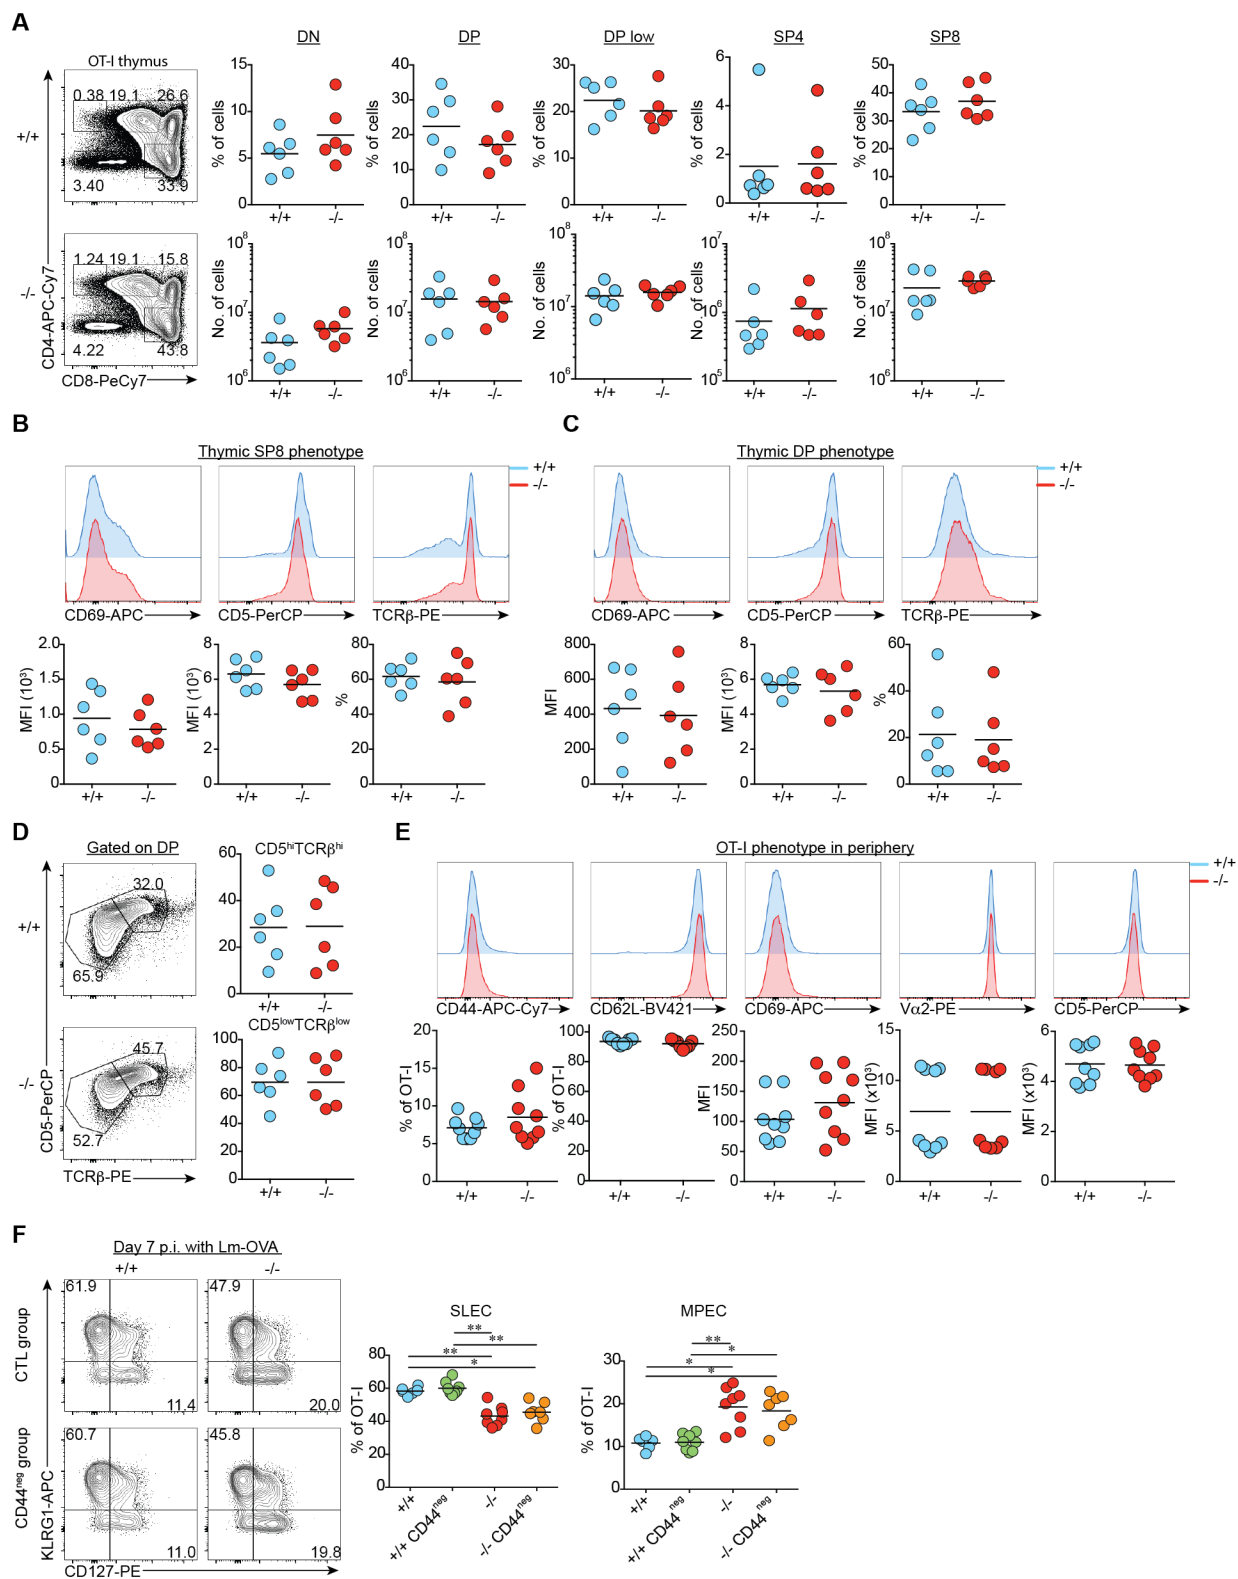

**Figure S2. Normal differentiation of OT-I T cells in absence of NR4A3.** A. Analysis of the different thymic subsets in OT-I *Nr4a3*<sup>+/+</sup> and *Nr4a3*<sup>-/-</sup> mice. Representative CD4 vs CD8 profiles and

compilation of the percentage and number of the different thymic subsets; DN ( $CD4^-CD8^-$ ), DP ( $CD4^+CD8^+$ ),  $DP^{low}$  ( $CD4^+CD8^{lo}$ ), SP4 ( $CD4^+CD8^-$ ) and SP8 ( $CD4^-CD8^+$ ). **B-C**. Expression of CD69, CD5 and TCR $\beta$  by SP8 (**B**) and DP (**C**) thymocytes. **D**. NR4A3 deficiency does not affect positive selection. FACS profiles of the expression of the TCR $\beta$  versus CD5 gated on DP thymocytes and compilation of the percentage of pre-selection (TCR $\beta^-CD5^{lo}$ ) and positively selected thymocytes (TCR $\beta^+CD5^{hi}$ ). **E**. Phenotype of OT-I CD8 $^+$  T cells from the lymph nodes of *Nr4a3<sup>+/+</sup>* and *Nr4a3<sup>-/-</sup>* mice. Representative FACS profiles and data compilation are shown. **F**. Proportion of MPECs ( $CD127^+KLRG1^-$ ) and SLECs ( $CD127^-KLRG1^+$ ) within *Nr4a3<sup>+/+</sup>* and *Nr4a3<sup>-/-</sup>* OT-I effectors at day 7 post-infection with Lm-OVA when the adoptive transfer prior infection was done with sorted CD44 $^{neg}$  OT-I CD8 $^+$  T cells. Data are from 2 (**F**), 3 (**E**) or 4 (**A-D**) independent experiments. A Mann-Whitney unpaired t-test (**A-D**) was used with a low number of samples and the unpaired Student's t-test (**E**), with a Welch's correction when applied, was used for 2 group comparison and Kruskal-Wallis ANOVA with Dunn's multiple comparison for multiple groups comparison (**F**): \* $P < 0.05$ , \*\* $P < 0.01$ .

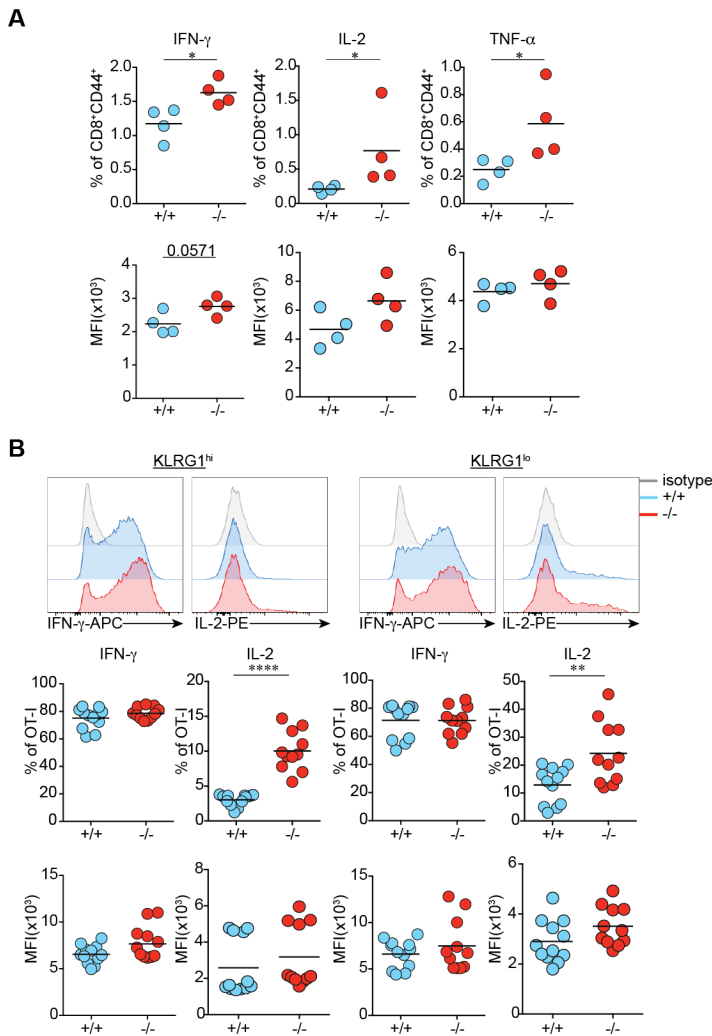

**Figure S3. NR4A3 decreases cytokine production by effector CD8<sup>+</sup> T cells.** **A.** Polyclonal CD8<sup>+</sup> T cell responses of *Nr4a3*<sup>+/+</sup> and *Nr4a3*<sup>-/-</sup> mice were measured at day 7 post-infection with Lm-OVA. Cytokine production was measured following a brief OVA peptide restimulation. Mean Fluorescence Intensity (MFI) on cells positive for the measured cytokines are shown. **B.** At the peak of the Lm-OVA response, splenocytes were restimulated with OVA peptide to measure cytokine production by *Nr4a3*<sup>+/+</sup> and *Nr4a3*<sup>-/-</sup> KLRG1<sup>hi</sup> or KLRG1<sup>lo</sup> OT-I cells. The percentage of positive OT-I cells for each cytokine and the MFI of cells positive for the measured cytokines are shown. Data are from 1 (**A**) or 2 (**B**) independent experiments. A Mann-Whitney unpaired t-test (**A**) was used with a low number of samples and the unpaired Student's t-test (**B**), with a Welch's correction when applied, was used for the other comparisons: \**P*<0.05, \*\**P*<0.01, \*\*\*\**P*<0.0001.

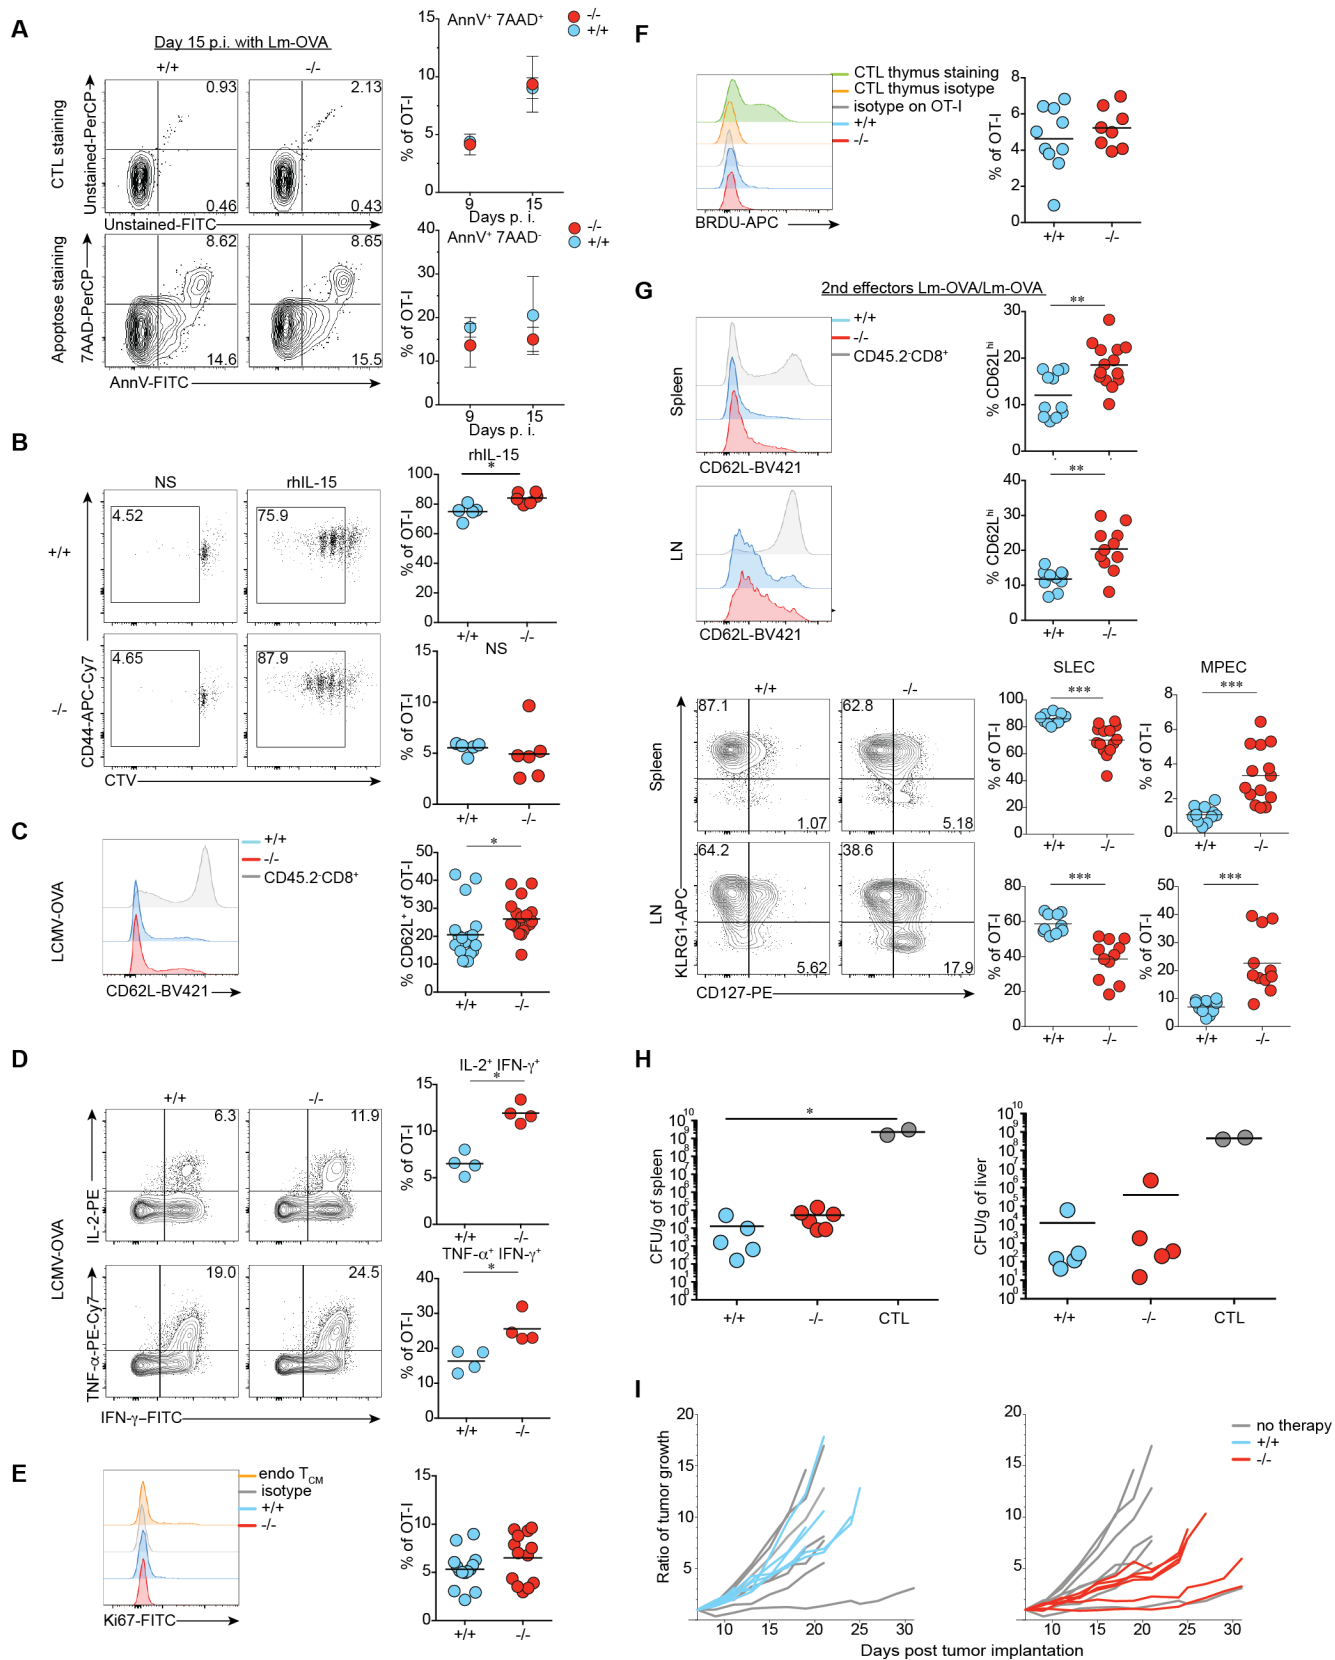

**Figure S4. NR4A3 deficiency favors polyfunctional central memory formation and restrains terminal differentiation of secondary effectors.** **A.** Apoptosis of *Nr4a3*<sup>+/+</sup> and *Nr4a3*<sup>-/-</sup> OT-I T cells during the contraction phase of the T cell response to Lm-OVA. At day 9 and 15 post-infection, apoptosis was measured using Annexin V (AnnV) and 7-AAD staining. Representative dot plots of AnnV versus 7-AAD staining for day 15 effectors and quantification of apoptotic (AnnV<sup>+</sup>7-AAD<sup>-</sup>) and dead (AnnV<sup>+</sup>7-AAD<sup>+</sup>) cells at day 9 and day15 post-infection are shown. **B.** Proliferation of *Nr4a3*<sup>+/+</sup> and *Nr4a3*<sup>-/-</sup> OT-I memory T cells from Lm-OVA infected mice following *in vitro* stimulation with rhIL-15. Representative FACS profile of CTV dilution and compilation of the percentage of cells that have divided once or more. **C-D.** CD62L expression (**C**) and cytokine production (**D**) measured on memory *Nr4a3*<sup>+/+</sup> and *Nr4a3*<sup>-/-</sup> OT-I cells (>30 days post LCMV-OVA-infection in a competitive setting) **E-F.** Homeostatic proliferation of Lm-OVA generated *Nr4a3*<sup>+/+</sup> and *Nr4a3*<sup>-/-</sup> OT-I memory cells measured using Ki67 (**E**) and anti-BrdU (**F**) staining. For BrdU staining mice were treated with BrdU for 14 days before sacrifice. **G.** Phenotype of secondary effectors at day 7 post-infection. 10<sup>4</sup> *Nr4a3*<sup>+/+</sup> or *Nr4a3*<sup>-/-</sup> memory OT-I T cells produced in response to Lm-OVA infection were adoptively transferred into naive B6.SJL mice. These recipients were then subsequently infected with Lm-OVA. **H.** Lm-OVA challenge. Mice previously adoptively transferred with *Nr4a3*<sup>+/+</sup> or *Nr4a3*<sup>-/-</sup> OT-I T cells and infected with LCMV-OVA were challenged with Lm-OVA at the memory stage (CTL: non immunized mice). Bacterial burdens in the spleen and liver are shown. **I.** *Nr4a3*<sup>+/+</sup> and *Nr4a3*<sup>-/-</sup> memory OT-I cells were generated in response to Lm-OVA infection. At least 40 days post-infection, approximately 2 x 10<sup>5</sup> *Nr4a3*<sup>+/+</sup> or *Nr4a3*<sup>-/-</sup> OT-I memory cells were adoptively transferred into B16-OVA bearing mice (7 days post-implantation) and the ratio of tumor growth (tumor area at each time point of observation reported to tumor area at day 7 - the time of ACT administration) was followed over time (same experiments as Fig. 3H). Each line represents one mouse. Data are from 1 (**A, D, H**), 2 (**F**) or 3 and more independent experiments (**C, E, G**); **B** and **I** shows one of 2 representative



experiments. Mann-Whitney unpaired t-test (**A, B, D**), when a low number of experimental samples were available, was used. Unpaired Student's t-test (**C, E, F, G**), with a Welch's correction when applied, was used for 2 group comparison and Kruskal-Wallis ANOVA with Dunn's multiple comparison for multiple groups comparison (**H**): \* $P < 0.05$ , \*\* $P < 0.01$ , \*\*\* $P < 0.001$ .

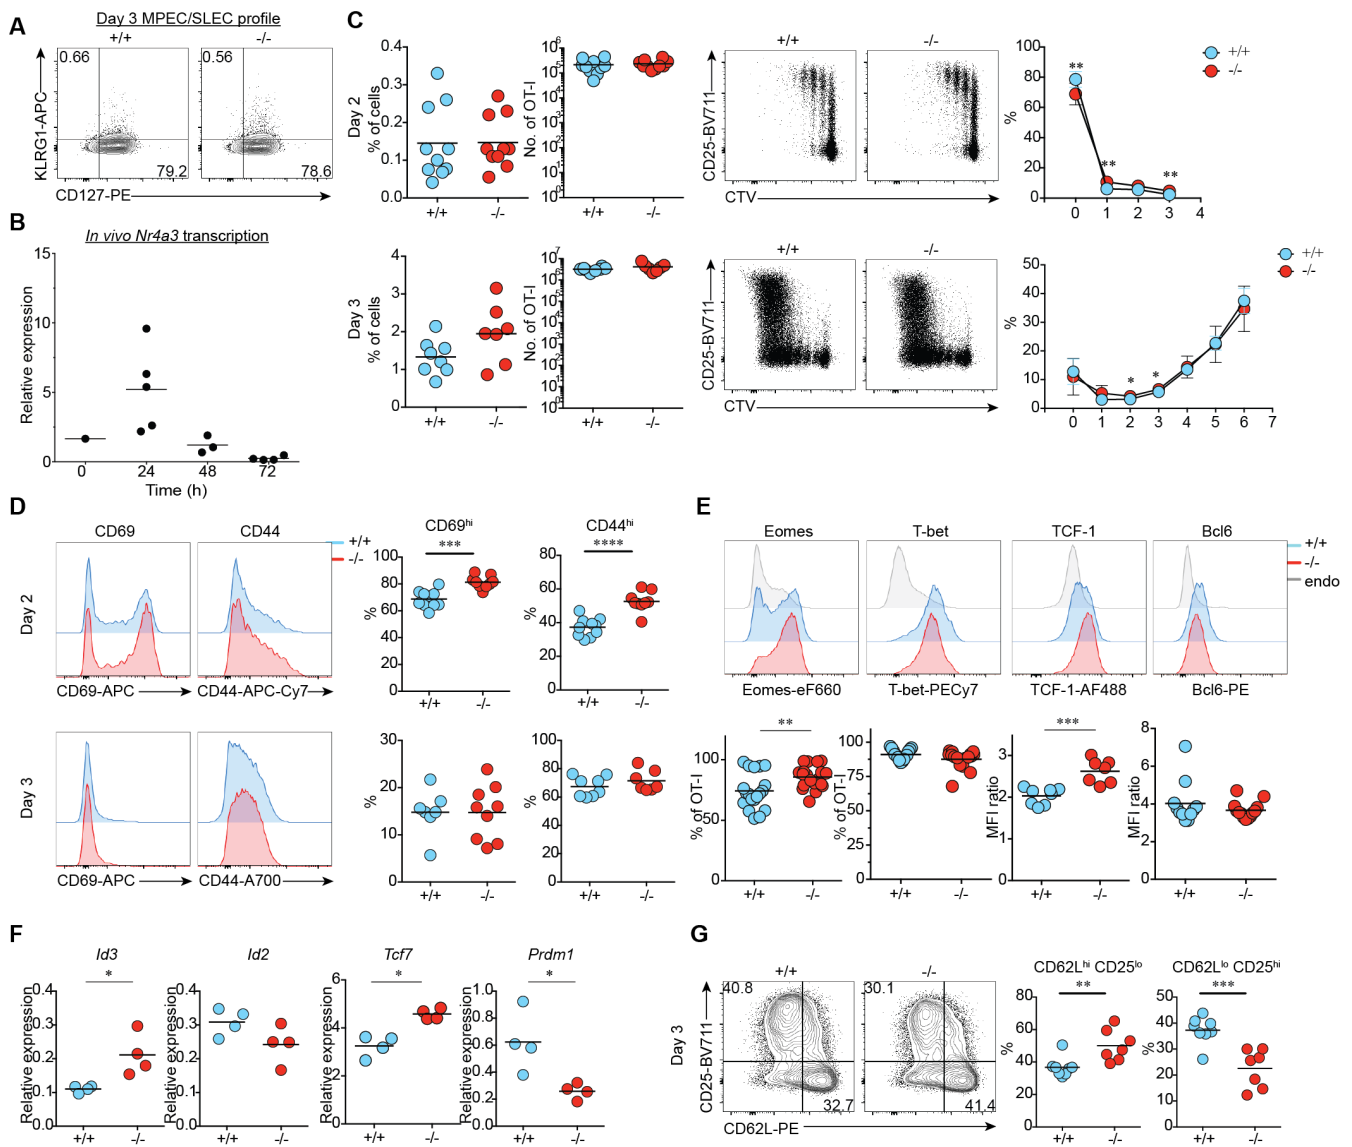

**Figure S5. *In vivo* transcription kinetics of *Nr4a3*, characterization of early response of NR4A3-deficient OT-I T cells and validation of RNA-seq results.** **A.** SLEC/MPEC profile at day 3 post Lm-OVA infection. **B.** At indicated time-points post-Lm-OVA infection, OT-I T cells were sorted and *Nr4a3* transcription was measured by qRT-PCR. **C-D.** Proliferation (**C**) and activation (**D**) of *Nr4a3*<sup>+/+</sup> or *Nr4a3*<sup>-/-</sup> OT-I T cells *in vivo*. CTV-labeled OT-I T cells were adoptively transferred into B6.SJL recipients followed by Lm-OVA infection. The percentage of OT-I T cells recovered, FACS profiles of CTV versus CD25 gated on OT-I T cells and quantification of the number of divisions at day 2 (top) and 3 (bottom) are shown in **C**. The expression of the activation markers CD69 and CD44 are shown in **D**. **E.** Expression of the transcription factors Eomes, T-bet, TCF-1, and Bcl6. **F.** Relative expression of *Id3*, *Id2*, *Tcf7*, and *Prdm1* at Day 3. **G.** CD62L expression and quantification of CD62L<sup>hi</sup> CD25<sup>lo</sup> and CD62L<sup>lo</sup> CD25<sup>hi</sup> cells at Day 3.

**D** at day 2 (top) and day 3 (bottom) post-infection. **E-F**. At day 3 post Lm-OVA infection, the expression of transcription factors important for memory CD8<sup>+</sup> T cells differentiation was assessed by cytometry after gating on CD44<sup>hi</sup> OT-I (CD45.2<sup>+</sup>) cells (**E**) or by qRT-PCR on sorted *Nr4a3*<sup>+/+</sup> and *Nr4a3*<sup>-/-</sup> OT-I cells (**F**). **G**. CD62L and CD25 FACS profiles and quantification of the CD25<sup>lo</sup>CD62L<sup>hi</sup> and CD25<sup>hi</sup>CD62L<sup>lo</sup> subsets of OT-I effector T cells at day 3 post-infection with Lm-OVA. Each dot represents one mouse. Data are from 1 (**B**, **F**), 2 (**E** for TCF-1, day 3 of **C**, **D** and **G**) or 3 and more (**E**, day 2 of **C** and **D**) independent experiments. Data in (**A**) is representative of at least 3 experiments. A Mann-Whitney unpaired t-test (**F**), when a low number of experimental samples were available was used. Unpaired Student's t-test (**C-E**, **G**), with a Welch's correction when applied, was used for comparison of two groups: \* $P < 0.05$ , \*\* $P < 0.01$ , \*\*\* $P < 0.001$ , \*\*\*\* $P < 0.0001$ .

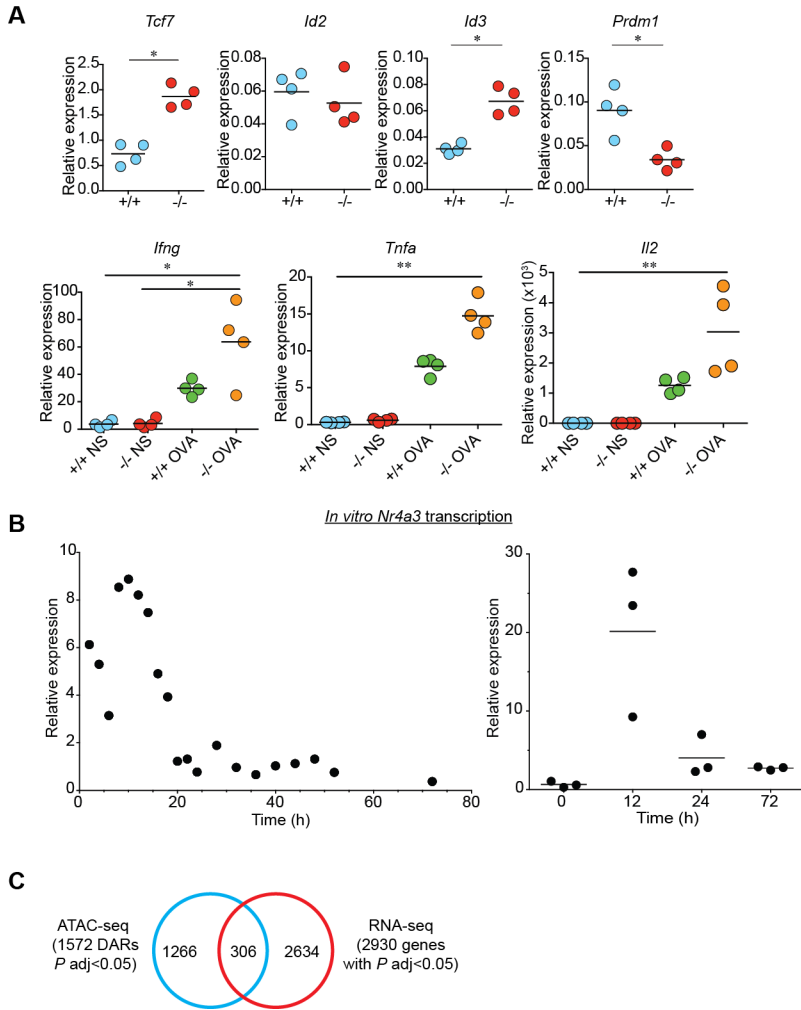

**Figure S6. Characterization of *in vitro* generated NR4A3-deficient OT-I effector cells and overlap between ATAC-seq and RNA-seq datasets.** **A.** *Nr4a3*<sup>+/+</sup> and *Nr4a3*<sup>-/-</sup> OT-I cells were stimulated for 3 days with anti-CD3/CD28. For transcription of cytokines, cells were not restimulated (NS) or seeded on antigen-loaded splenocytes (+OVA) for 5h prior being cell-sorted into TRIzol for RNA extraction. The expression of transcription factors was assessed on NS sorted *Nr4a3*<sup>+/+</sup> and *Nr4a3*<sup>-/-</sup> OT-I cells. **B.** *Nr4a3* expression kinetics measured by qRT-PCR following *in vitro* stimulation with anti-CD3/CD28. The left panel represents several time points from the same experiment. The right panel is from 1 experiment with independent samples (each point represents an individual mouse). **C.** Overlap between

RNA-seq and ATAC-seq datasets showing the number of genes that have a modulated expression and are associated to a DAR as a result of NR4A3-deficiency. Each dot represents one mouse. Data are from 1 (**A**, **B**, **C**: ATAC-seq) or 2 independent experiments (**C**: RNA-seq). A Mann-Whitney unpaired t-test (**A**) was used with a low number of experimental samples for 2 group comparison and Kruskal-Wallis ANOVA with Dunn's multiple comparison was used for multiple groups comparison: \* $P < 0.05$ , \*\* $P < 0.01$ .

**Table S1. Antibodies and reagents.**

| <b>Reagent</b>                                             | <b>Company</b>                                | <b>Product information</b>              |
|------------------------------------------------------------|-----------------------------------------------|-----------------------------------------|
| G418 sulfate powder                                        | CORNING                                       | CAS#108321-42-2; Potency 716µg/mg       |
| RPMI 1640                                                  | CORNING                                       | REF: 10-040-CV                          |
| HEPES                                                      | CORNING                                       | REF: 25-060-C1                          |
| L-glutamine                                                | CORNING                                       | REF: 25-005-C1                          |
| Penicillin-Streptomycin                                    | CORNING                                       | REF: 30-002-C1                          |
| MEM Non-essential amino acids                              | Gibco Life Technologies                       | REF: 11140-050                          |
| Sodium pyruvate                                            | CORNING                                       | REF: 25-000-C1                          |
| 2-mercaptoethanol 1000x (55mM)                             | Gibco Life Technologies                       | REF: 21985-023                          |
| PBS                                                        | Sigma Life Science                            | REF: P3813-10PAK                        |
| Sodium azide                                               | Sigma Aldrich                                 | REF: S2002-100G                         |
| formaldehyde solution (PFA)                                | Sigma Aldrich                                 | CAS #50-00-0                            |
| BHI-Agar                                                   | BD                                            | REF: 211065                             |
| Streptomycine sulfate                                      | Bio Basic                                     | REF: SB0494; CAS#3810-74-0              |
| rhIL-2                                                     | Novartis                                      | PROLEUKIN® (aldesleukine); DIN 02130181 |
| NH4Cl                                                      | Bio Basic                                     | CAS #12125-02-9                         |
| eBioscience FOXP3/Transcription Factor Staining Buffer Set | Invitrogen by Thermo Fisher Scientific        | REF: 00-5523-00                         |
| Cytofix cytoperm BD Kit                                    | BD                                            | 554714                                  |
| TRIzol                                                     | ambion by Life Technologies                   | REF: 15596026                           |
| DMEM powder                                                | Sigma Life Science                            | REF: D2902-101                          |
| Saponine                                                   | Sigma Life Science                            | REF: S-7900-100g; CAS #8047-15-2        |
| PowerSYBR Green SuperScript II Reverse Transcriptase       | appliedbiosystems by Thermo Fisher Scientific | REF: 4367659                            |
| DMEM                                                       | invitrogen by Thermo Fisher Scientific        | REF: 18064014                           |
| Mouse naive CD8 T cells EasySep KIT                        | CORNING                                       | REF: 10-017-CV                          |
|                                                            | STEMCELL Technologies                         | REF: 19858                              |
| Nu Serum                                                   | Corning                                       | REF: 355104                             |

|                                                  |                              |                          |
|--------------------------------------------------|------------------------------|--------------------------|
| EDTA                                             | CORNING                      | 46-034-C1                |
| <i>Lymphocyte Separation Medium</i>              | CORNING                      | 25-072-CV                |
| Fc-block (Anti mCD16/32 Fc Receptor clone 2.4G2) | Leinco Technologies          | C381-1.0mg               |
| Zombie Aqua                                      | Biolegend                    | 423102                   |
| Zombie NIR                                       | Biolegend                    | 423106                   |
| CTV (CellTraceViolet)                            | ThermoFisher                 | C34557                   |
| AnnexinV-FITC                                    | Biolegend                    | 640906                   |
| 7-AAD                                            | Biolegend                    | 420404                   |
| pMIG                                             | kind Gift from Guy Sauvageau | pMSCV IRES GFP           |
| frosted glass slides                             | Fisher                       | 125523                   |
| 24 well plates                                   | Sarstedt                     | 5000004003 (83.3922.500) |
| 6 well plates                                    | Fisher                       | 08 772 1B                |
| 96 well plates                                   | Fisher                       | 07200760                 |
| Cell strainer 70µm                               | Fisher                       | 08 771 2                 |
| Cell strainer 100µm                              | Fisher                       | 08 771 19                |
| Brefeldin A                                      | Fisher                       | AAJ62340MB               |
| cOmplete™, EDTA-free Protease Inhibitor Cocktail | Sigma (Roche)                | 11873580001              |
| rhIL15                                           | R&D                          | 247-ILB                  |
| BRDU                                             | Sigma                        | B5002-1G                 |
| DNase I                                          | Sigma                        | D5025-150KU              |
| Brain Heart Infusion (BHI)                       | Fisher                       | B11065                   |
| NP-40Octyl                                       |                              |                          |
| Phenoxyethoxyethanol (NP-40)                     | Bio-Basic                    | NDB0385-100              |

---

| <b>Stimulation reagents</b> | <b>Company</b>  | <b>Product information</b>     |
|-----------------------------|-----------------|--------------------------------|
| anti mouse CD3ε             | BioXcell        | clone 145-2C11; cat # BE0001-1 |
| anti mouse CD28             | BioXcell        | clone 37-51; cat # BE0015-1    |
| OVA peptide (SIINFEKL)      | Midwest Biotech |                                |

---

| <b>Staining antibody</b>                  | <b>Company</b>                                        | <b>Product information</b>      |
|-------------------------------------------|-------------------------------------------------------|---------------------------------|
| CD8-PerCP anti mouse                      | BioLegend                                             | clone 53-6.7; cat # 100732      |
| CD8-PeCY7 anti mouse                      | BioLegend                                             | clone 53-6.7; cat # 100722      |
| KLRG1-APC                                 | BioLegend                                             | clone MAFA; cat #138412         |
| CD127-Biotin                              | Invitrogen by Thermo Fisher Scientific                | clone A7R34; cat #13-1271-85    |
| CD127-BV421 anti mouse                    | BioLegend                                             | clone A7R34; cat #135027        |
| Streptavidin-PE                           | BioLegend                                             | cat # 405204                    |
| Isotype of IFN-gamma-FITC (Rat IgG1 FITC) | Invitrogen by Thermo Fisher Scientific                | IgG gamma 1 ; cat #R101         |
| Isotype of IFN-gamma-APC (Rat IgG1 APC)   | Invitrogen by Thermo Fisher Scientific<br>eBioscience | clone eBRG1; cat #17-4301-83    |
| Isotype of IL-2-PE (Rat IgG2 $\beta$ -PE) | BioLegend                                             | clone RTK4530; cat #400608      |
| Isotype of TNFa-PeCY7 (Rat IgG1 PeCY7)    | BioLegend                                             | clone RTK2071; cat #400415      |
| Isotype of GranzymeB- PB (Rat IgG1 PB)    | BioLegend                                             | clone MOPC-21; cat #400151      |
| IFN-gamma-FITC anti mouse                 | Invitrogen by Thermo Fisher Scientific                | clone XMG1.2; cat #RM9001       |
| IFN-gamma-APC anti mouse                  | Invitrogen by Thermo Fisher Scientific<br>eBioscience | clone XMG1.2; cat #17-7311-82   |
| IL-2-PE anti mouse                        | BioLegend                                             | clone JES6-5H4; cat #503808     |
| TNFa-PeCY7 anti mouse                     | BioLegend                                             | clone MP6-XT22; cat #506324     |
| GranzymeB- PB anti Hu/Mo                  | BioLegend                                             | clone GB11; cat #515408         |
| CD45.1-BV650                              | BioLegend                                             | clone A20; cat #110736          |
| CD45.1-PB                                 | BioLegend                                             | clone A20; cat #110722          |
| CD45.2-FITC                               | BioLegend                                             | clone 104; cat #109806          |
| CD45.2-A700                               | BioLegend                                             | clone 104; cat #109822          |
| CD45.2-APC                                | BioLegend                                             | clone 104; cat #109814          |
| CD62L-BV421 anti mouse                    | BioLegend                                             | clone MEL-14; cat #104436       |
| CD62L-PerCP anti mouse                    | BioLegend                                             | clone MEL-14; cat #104430       |
| CD62L-PE anti mouse                       | BioLegend                                             | clone MEL-14; cat #104407       |
| Eomes-eF660 anti mouse                    | Invitrogen by Thermo Fisher Scientific                | clone Dan11mag; cat #50-4875-82 |



|                                                 |                                        |                                              |
|-------------------------------------------------|----------------------------------------|----------------------------------------------|
| Tbet-PeCy7 anti Hu/Mo                           | Invitrogen by Thermo Fisher Scientific | clone 4B10; cat #25-5825-82                  |
| TCF1-AF488 anti Hu/Mo                           | Cell Signaling Technologies            | clone C63D9 ; cat #6444S                     |
| CD69-APC                                        | BioLegend                              | clone H1.2F3; cat #104513                    |
| CD44-APC-Cy7                                    | BioLegend                              | clone IM7; cat #103028                       |
| CD44-AF700                                      | BioLegend                              | clone IM7; cat #103026                       |
| CD25-APC                                        | BioLegend                              | clone PC61; cat #102012                      |
| CD25-BV711 anti mouse                           | BioLegend                              | clone PC61; cat #102049                      |
| TCR $\beta$ -PE                                 | BioLegend                              | clone H57-597; cat #109207                   |
| V $\alpha$ 2-PE                                 | BioLegend                              | clone B20.1; cat #127808                     |
| CD5-PerCP                                       | BioLegend                              | clone 53-7.3; cat #100616                    |
| Ki67-FITC                                       | BD Biosciences                         | clone B56; kit cat # 556026; cat # 51-36524X |
| isotype of Ki67-FITC (Mouse IgG1 $\kappa$ FITC) | BD Biosciences                         | MOPC-21; kit cat # 556026; cat # 51-35404X   |
| BRDU-APC (Mouse IgG1 $\kappa$ APC)              | Fisher/eBiosciences                    | clone BU20A; cat # 17-5071-41                |
| isotype of BRDU-APC                             | Fisher/eBiosciences                    | clone P3.6.2.8.1; cat #17-4714-42            |

---

### qPCR Primers

### Sequences of primers

|              |                                                         |
|--------------|---------------------------------------------------------|
| <i>Id3</i>   | F: GGAGAGAGGGTCCCAGAGTC; R: GAGGAGCTTTTGCCACTGAC        |
| <i>Tcf7</i>  | F: GCGGATATAGACAGCACTTC; R: TACACCAGATCCCAGCAT          |
| <i>Id2</i>   | F: ACCAGAGACCTGGACAGAAC; R: AAGCTCAGAAGGGAATTCAG        |
| <i>Prdm1</i> | F: ACACACAGGAGAGAAGCCACATGA; R:TCGAAGGTGGGTCTTGAGATTGCT |
| <i>Nr4a3</i> | F: GATCACAGAGCGACATGGGTTA; R:GAGCCTGTCCCTTCCTCTGG       |
| <i>Ifng</i>  | F: GAAAGCCTAGAAAGTCTGAATAAC; R: TGCCAGTTCCTCCAGATA      |
| <i>Il2</i>   | F: CAGCAATATCAGAGTAACTGTTG; R: GCTATCCATCTCCTCAGAAAG    |
| <i>Tnfa</i>  | F: TCTTCTCATTCCTGCTTGTG; R:GAGGCCATTTGGGAACTT           |
| <i>Hprt</i>  | F:CTCCTCAGACCGCTTTTTTGC; R: TAACCTGGTTCATCATCGCTAATC    |

---

| <b>Cell lines</b> | <b>Origin</b>                                                                    |                                                                                                          |
|-------------------|----------------------------------------------------------------------------------|----------------------------------------------------------------------------------------------------------|
| L929              | kind gift from A. Lamarre (INRS-Institut Armand-Frappier, Laval, Quebec, Canada) | MEM containing with 5% heat inactivated FBS or Nu serum                                                  |
| MC57G             | kind gift from A. Lamarre (INRS-Institut Armand-Frappier, Laval, Quebec, Canada) | MEM containing with 5% heat inactivated FBS or Nu serum                                                  |
| B16-OVA           | kind gift from A. Lamarre (INRS-Institut Armand-Frappier, Laval, Quebec, Canada) | DMEM supplemented with 10% FBS (or Nu serum), sodium pyruvate (1mM) in presence of 5mg/ml G418 (Corning) |
| HEK293T           | kind gift from H. Melichar (CRHMR, Montreal, Quebec, Canada)                     | DMEM containing with 10% heat inactivated FBS or Nu serum                                                |

| <b>Infection agents</b> | <b>Origin</b>                     |
|-------------------------|-----------------------------------|
| Lm-OVA                  | kind gift from S. P. Schoenberger |
| LCMV-OVA                | kind gift from J. C. de la Torre  |
